# Supplementary material for: Facile one-pot synthesis of heterostructure SnO2/ZnO photocatalyst for enhanced photocatalytic degradation of organic dye
Source: Royal Society of Chemistry journal article supplement (doi:10.1039/d0ra03233f), 2020-01-01
Supplement: d0ra03233f1.pdf [file d0ra03233f1.pdf]

## Facile one-pot synthesis of heterostructure SnO<sub>2</sub>/ZnO photocatalyst for enhanced photocatalytic degradation of organic dye

Md. Tamez Uddin,<sup>1\*</sup> Md Enamul Hoque<sup>1</sup>, Mitun Chandra Bhoumick<sup>1</sup>

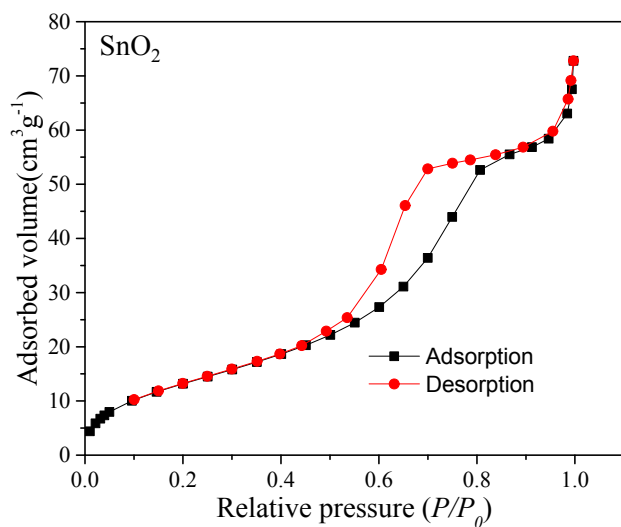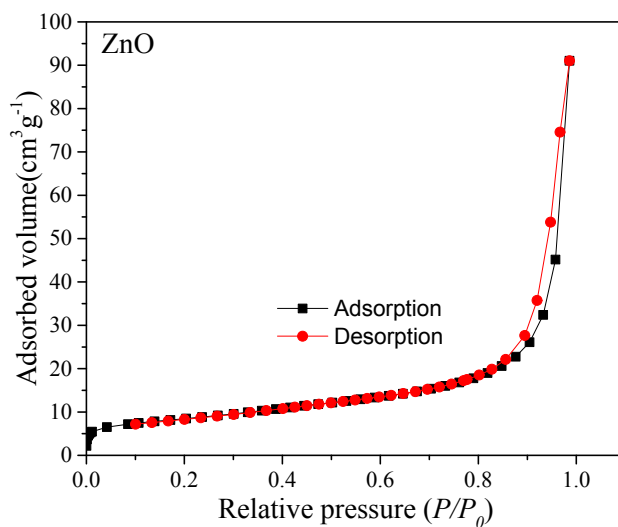

\*Corresponding author: Dr. Md. Tamez Uddin

Email: [mtuddin\\_cep@yahoo.com](mailto:mtuddin_cep@yahoo.com); [mtuddin-cep@sust.edu](mailto:mtuddin-cep@sust.edu)

Tel.: +880 821 717850, Ext 681; Fax: +880 821 715257

16-digit ORCID: 0000-0001-9235-1112

<sup>1</sup>Department of Chemical Engineering and Polymer Science, Shahjalal University of Science and Technology, Sylhet 3100, Bangladesh

Figure S1. Nitrogen adsorption-desorption isotherms of the SnO<sub>2</sub> and ZnO photocatalyst

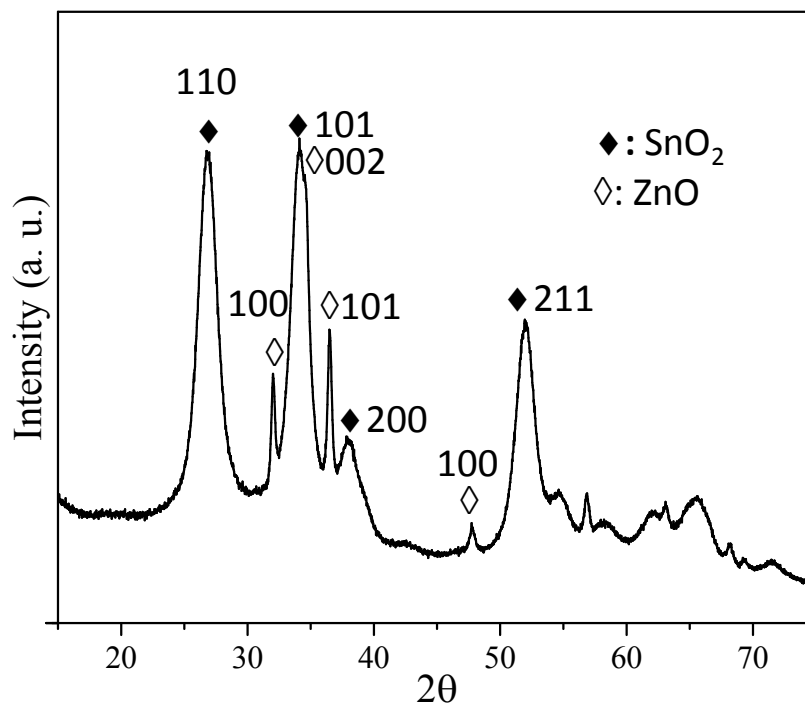

Figure S2. XRD pattern of SnO<sub>2</sub>/ZnO nanocomposites after three successive use.
